# Supplementary material
Source: PubMed Central journal article supplement (PMC2443671)
Supplement: M802417200_1.pdf [file M802417200_1.pdf]

Figure S1

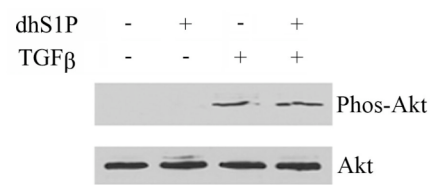

**Figure S1**  
Fibroblasts were treated with 2.5 ng/ml of TGF-β and 0.5 μM of dhS1P for 30 min. Phosphorylated Akt was detected by western blot.

Figure S2

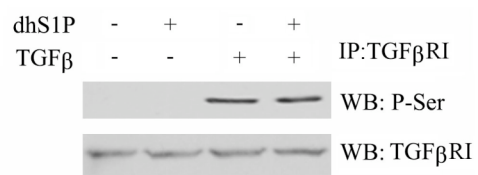

**Figure S2**

Fibroblasts were treated with 2.5 ng/ml of TGF- $\beta$  and 0.5  $\mu$ M of dhS1P for 30 min. Phosphorylation status of TGF $\beta$ RI was tested by IP western.

Figure S3

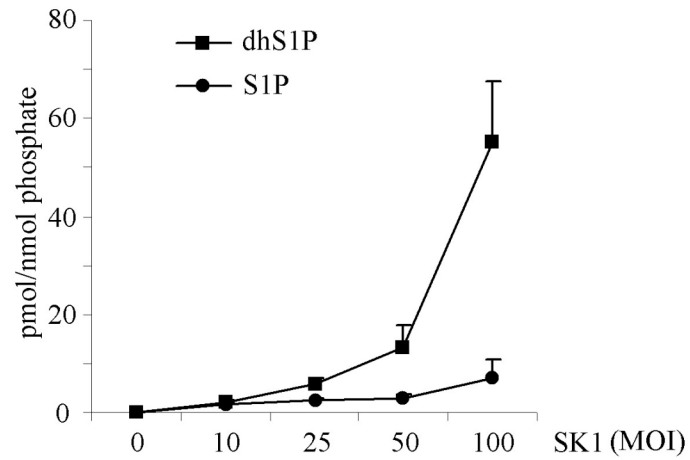

**Figure S3**

Effect of SK1 overexpression on S1P and dhS1P production. Foreskin fibroblasts were transduced with increasing doses of SK1 adenovirus for 24 h. Cell pellets were analyzed by ESI tandem mass spectrometry at the MUSC Lipidomics Core Facility as previously described (20). Basal levels of S1P and dhS1P were unchanged in the presence of control virus (data not shown).

Figure S4

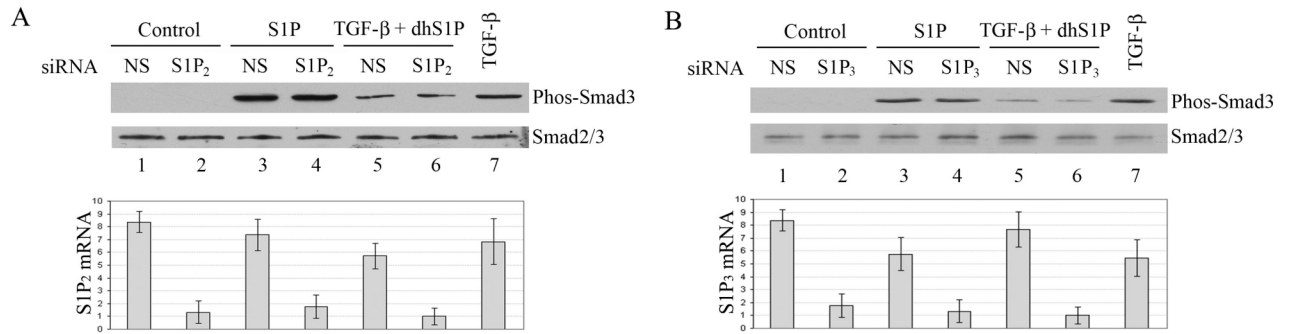

**Figure S4**

Depletion of endogenous S1P<sub>2</sub> or S1P<sub>3</sub> does not effect Smad3 phosphorylation in response to dhS1P and S1P treatment. Cells were transfected with 30 nM of S1P<sub>2</sub> or S1P<sub>3</sub> siRNA or Non-silencing (NS) siRNA for 24 h, then serum-starved overnight. Cells were treated with 1  $\mu$ M S1P or 2.5 ng/ml TGF $\beta$  plus 0.5  $\mu$ M dhS1P for 30 minutes. Phosphorylated Smad3 was detected by immunoblotting.
